# Supplementary material
Source: MDPI journal article supplement (https://www.mdpi.com/2673-3994/5/3/25)
Supplement: s1 [file s1=3fversion=3d1724836172]

## Supplementary Materials

### Steam Reforming of Tar Impurities from Biomass Gasification with Ni-Co/Mg(Al)O Catalysts – Operating Parameter Effects

Ask Lysne\*, Ida Saxrud, Kristin Ø. Madsen and Edd A. Blekkan\*

Department of Chemical Engineering, Norwegian University of Science and Technology, Sem Sælandsvei 4, 7491 Trondheim, Norway

\* Correspondence: ask.lysne@sintef.no (A.L); edd.a.blekkan@ntnu.no (E.A.B.)

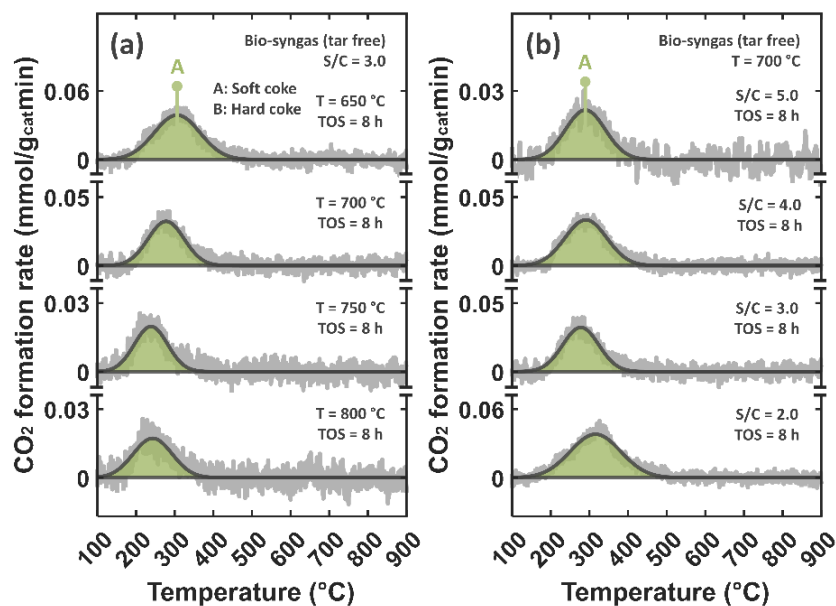

**Figure S1.** Post-run CO<sub>2</sub> formation in TPO-MS coke combustion experiments following steam reforming of CH<sub>4</sub> in tar free environment at different operating conditions (syngas = 10/35/25/25 mol% CH<sub>4</sub>/H<sub>2</sub>/CO/CO<sub>2</sub> with 5 mol% N<sub>2</sub> internal standard, Ar balance, syngas flow = 400 NmL/min, GHSV = 85000 NmL/g<sub>cat</sub>min)

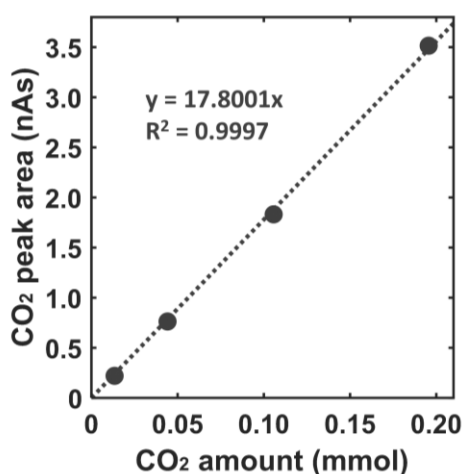

**Figure S2.** MS-detector calibration curve from TPO-MS based on CO<sub>2</sub> formation upon thermal decomposition of calcium oxalate monohydrate (third degradation step:  $\text{CaCO}_3 \rightarrow \text{CaO} + \text{CO}_2$ ).

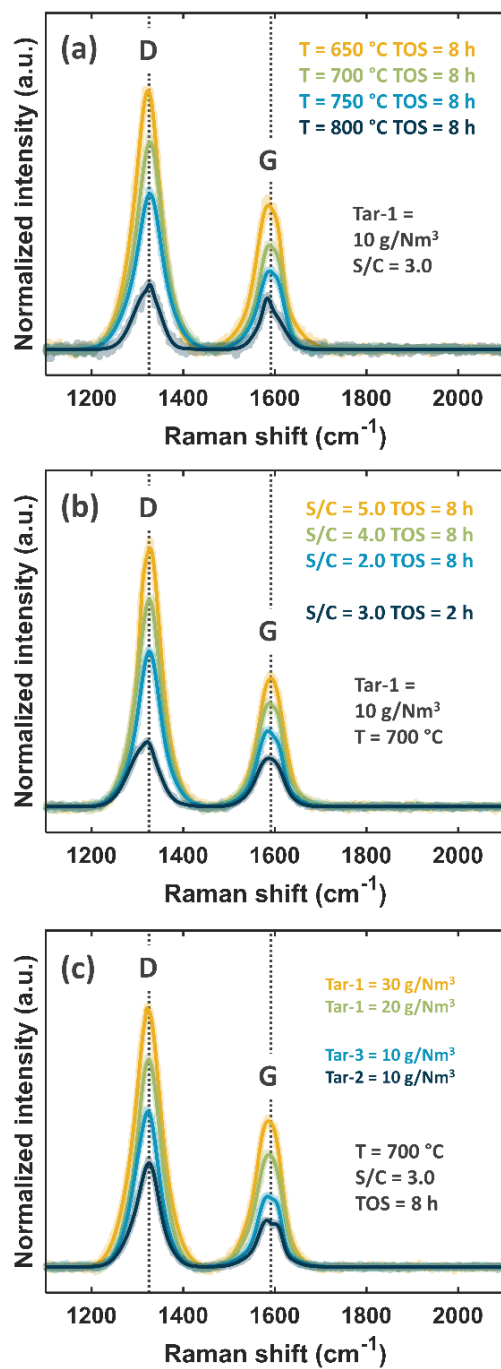

**Figure S3.** Raman spectra following model tar steam reforming at different operating conditions (syngas = 10/35/25/25 mol%  $\text{CH}_4/\text{H}_2/\text{CO}/\text{CO}_2$  with 5 mol%  $\text{N}_2$  internal standard, Ar balance, syngas flow = 400 NmL/min, GHSV = 85000 NmL/g<sub>cat</sub>min, Tar-1 = 100/0/0, Tar-2 = 75/25/0 and Tar-3 = 70/25/5 wt% toluene/1-methylenaphthalene/phenol).

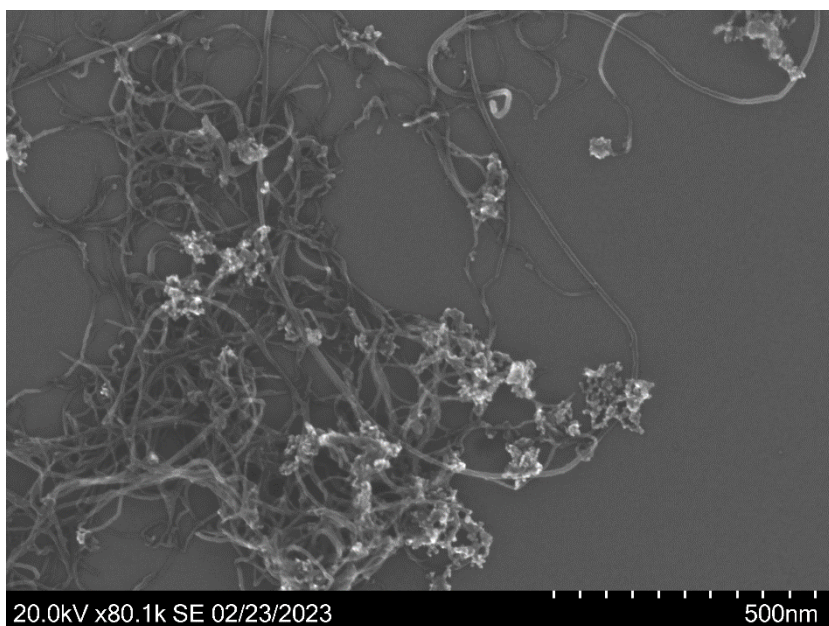

**Figure S4.** Unedited STEM image of filamentous carbon following tar steam reforming (temperature = 700 °C, S/C = 3.0, TOS = 2 hours, syngas = 10/35/25/25 mol% CH<sub>4</sub>/H<sub>2</sub>/CO/CO<sub>2</sub> with 5 mol% N<sub>2</sub> internal standard, Ar balance, syngas flow = 400 NmL/min, GHSV = 85000 NmL/g<sub>cat</sub>min, tar model = 10 g/Nm<sup>3</sup> toluene).

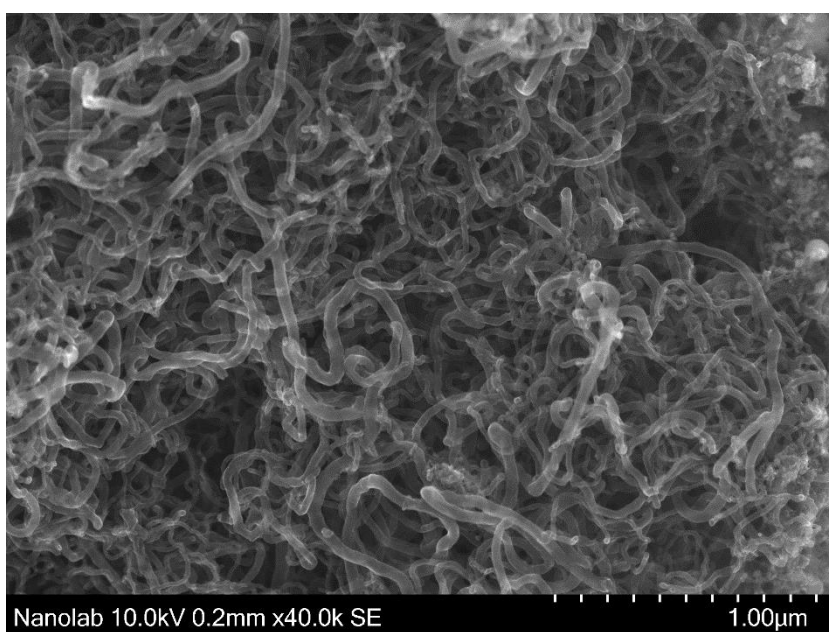

**Figure S5.** Unedited STEM image of filamentous carbon following tar steam reforming (temperature = 700 °C, S/C = 3.0, TOS = 8 hours, syngas = 10/35/25/25 mol% CH<sub>4</sub>/H<sub>2</sub>/CO/CO<sub>2</sub> with 5 mol% N<sub>2</sub> internal standard, Ar balance, syngas flow = 400 NmL/min, GHSV = 85000 NmL/g<sub>cat</sub>min, tar model = 10 g/Nm<sup>3</sup> toluene).

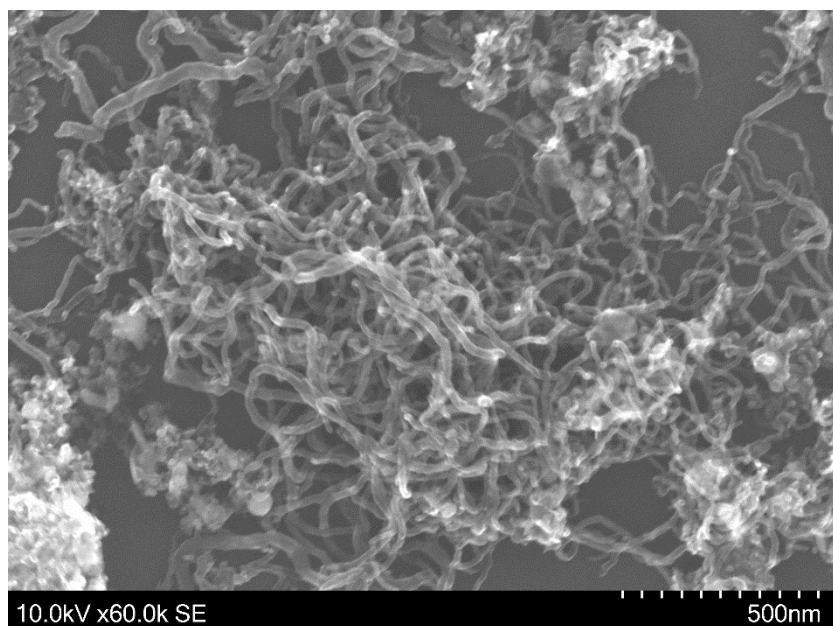

**Figure S6.** Unedited STEM image of filamentous carbon following tar steam reforming (temperature = 650 °C, S/C = 3.0, TOS = 8 hours, syngas = 10/35/25/25 mol% CH<sub>4</sub>/H<sub>2</sub>/CO/CO<sub>2</sub> with 5 mol% N<sub>2</sub> internal standard, Ar balance, syngas flow = 400 NmL/min, GHSV = 85000 NmL/g<sub>cat</sub>min, tar model = 10 g/Nm<sup>3</sup> toluene).

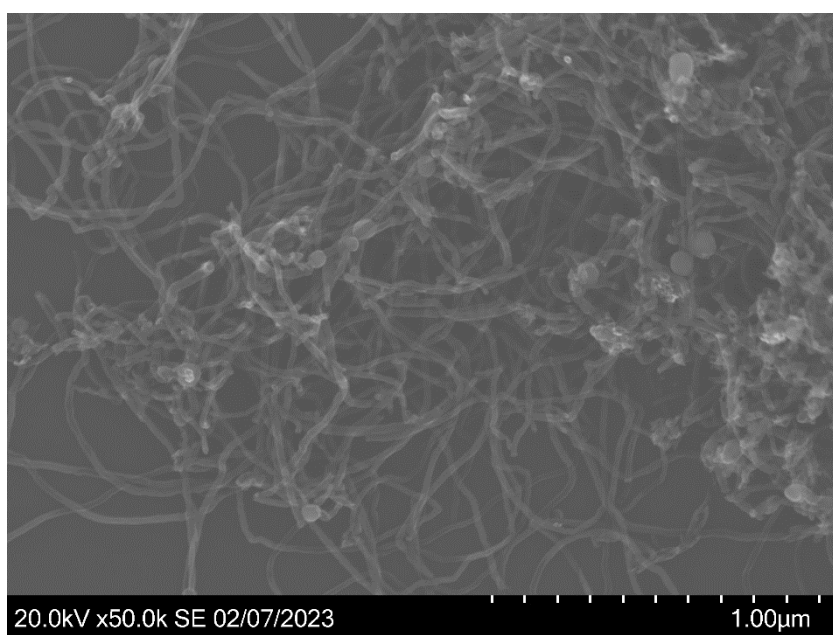

**Figure S7.** Unedited STEM image of filamentous carbon following tar steam reforming (temperature = 800 °C, S/C = 3.0, TOS = 8 hours, syngas = 10/35/25/25 mol% CH<sub>4</sub>/H<sub>2</sub>/CO/CO<sub>2</sub> with 5 mol% N<sub>2</sub> internal standard, Ar balance, syngas flow = 400 NmL/min, GHSV = 85000 NmL/g<sub>cat</sub>min, tar model = 10 g/Nm<sup>3</sup> toluene).

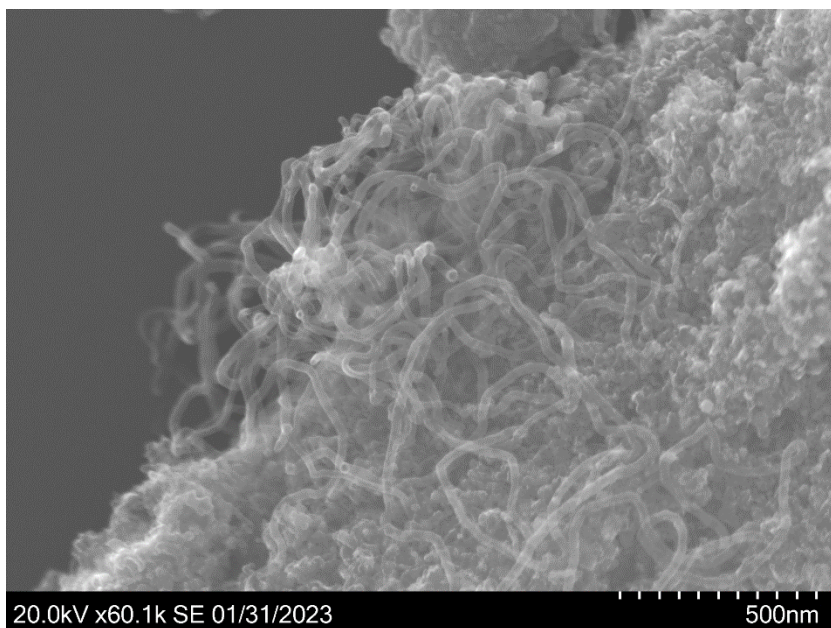

**Figure S8.** Unedited STEM image of filamentous carbon following tar steam reforming (temperature = 700 °C, S/C = 2.0, TOS = 8 hours, syngas = 10/35/25/25 mol% CH<sub>4</sub>/H<sub>2</sub>/CO/CO<sub>2</sub> with 5 mol% N<sub>2</sub> internal standard, Ar balance, syngas flow = 400 NmL/min, GHSV = 85000 NmL/g<sub>cat</sub>min, tar model = 10 g/Nm<sup>3</sup> toluene).

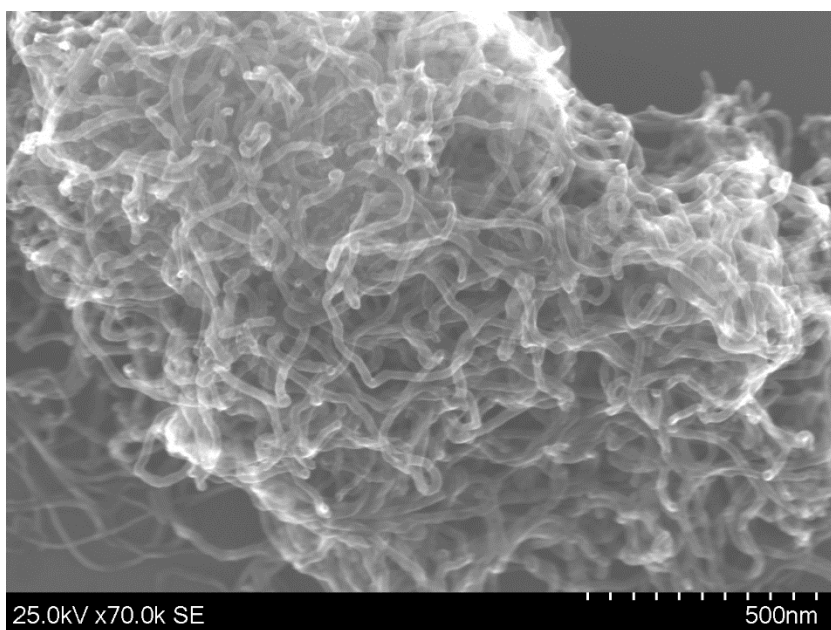

**Figure S9.** Unedited STEM image of filamentous carbon following tar steam reforming (temperature = 700 °C, S/C = 5.0, TOS = 8 hours, syngas = 10/35/25/25 mol% CH<sub>4</sub>/H<sub>2</sub>/CO/CO<sub>2</sub> with 5 mol% N<sub>2</sub> internal standard, Ar balance, syngas flow = 400 NmL/min, GHSV = 85000 NmL/g<sub>cat</sub>min, tar model = 10 g/Nm<sup>3</sup> toluene).



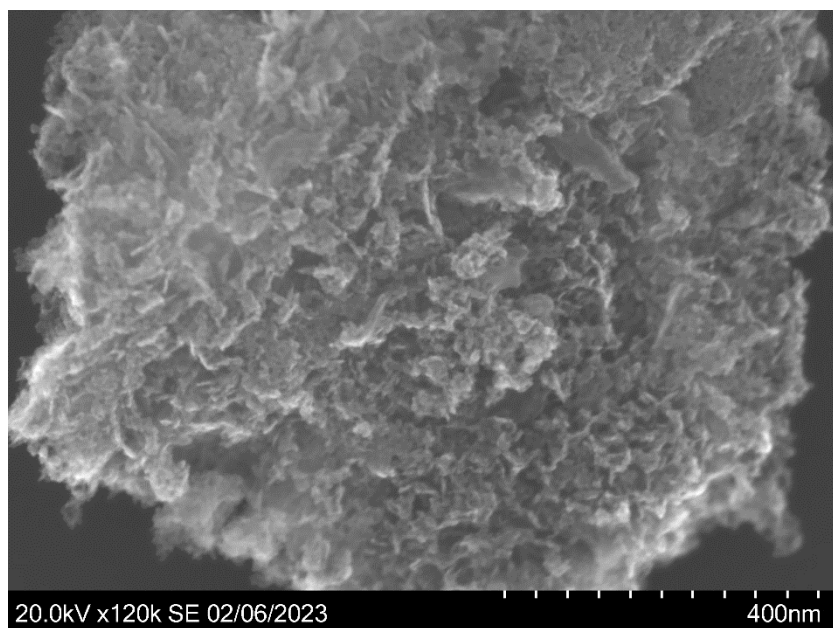

**Figure S10.** Unedited STEM image of fresh catalyst structures.

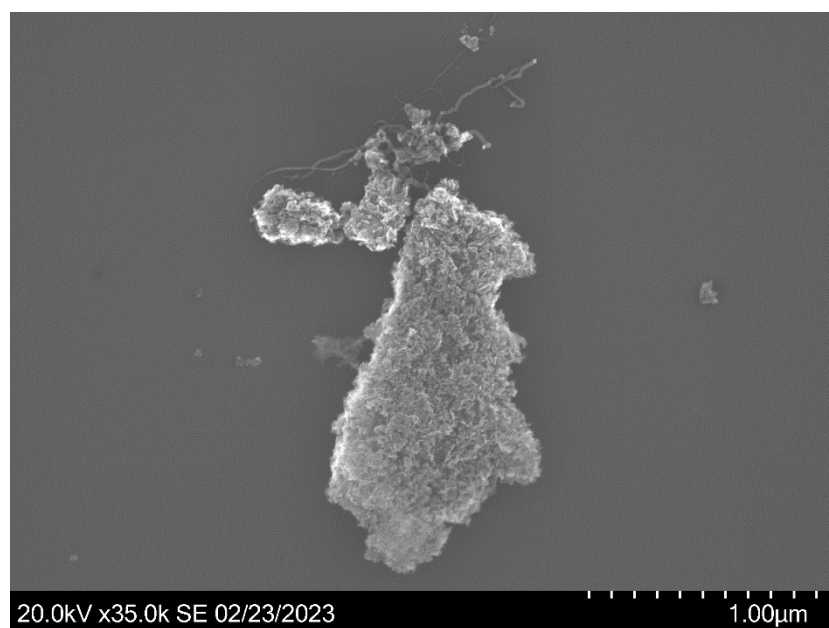

**Figure S11.** Unedited STEM image of fresh catalyst structures following tar steam reforming (temperature = 700 °C, S/C = 3.0, TOS = 2 hours, syngas = 10/35/25/25 mol% CH<sub>4</sub>/H<sub>2</sub>/CO/CO<sub>2</sub> with 5 mol% N<sub>2</sub> internal standard, Ar balance, syngas flow = 400 NmL/min, GHSV = 85000 NmL/g<sub>cat</sub>min, tar model = 10 g/Nm<sup>3</sup> toluene).

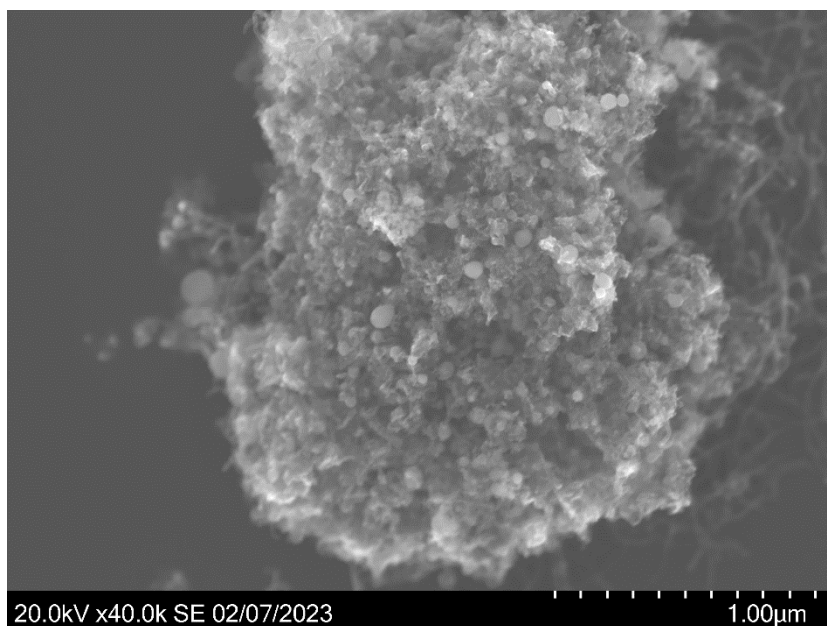

**Figure S12.** Unedited STEM image of sintered metal particles following tar steam reforming (temperature = 800 °C, S/C = 3.0, TOS = 8 hours, syngas = 10/35/25/25 mol% CH<sub>4</sub>/H<sub>2</sub>/CO/CO<sub>2</sub> with 5 mol% N<sub>2</sub> internal standard, Ar balance, syngas flow = 400 NmL/min, GHSV = 85000 NmL/g<sub>cat</sub>min, tar model = 10 g/Nm<sup>3</sup> toluene).

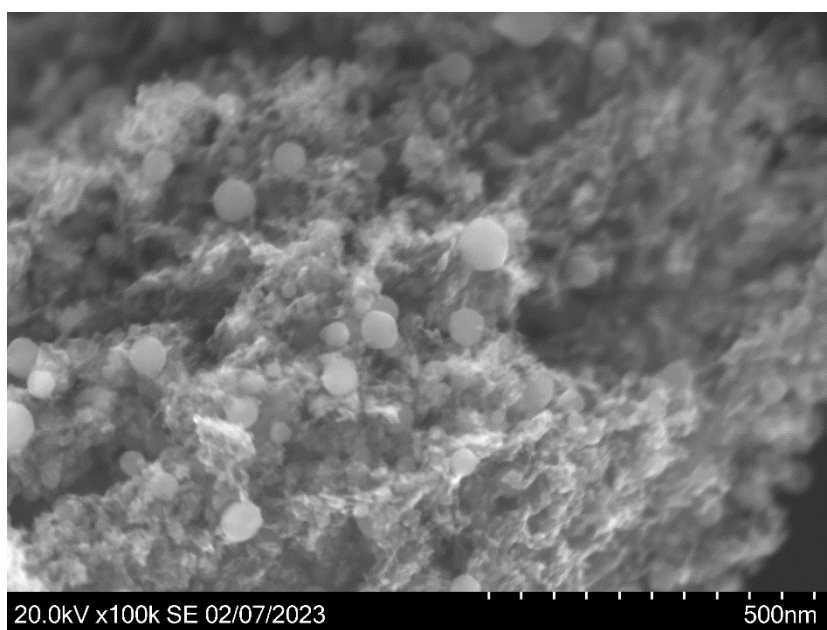

**Figure S13.** Unedited STEM image of sintered metal particles following tar steam reforming (temperature = 800 °C, S/C = 3.0, TOS = 8 hours, syngas = 10/35/25/25 mol% CH<sub>4</sub>/H<sub>2</sub>/CO/CO<sub>2</sub> with 5 mol% N<sub>2</sub> internal standard, Ar balance, syngas flow = 400 NmL/min, GHSV = 85000 NmL/g<sub>cat</sub>min, tar model = 10 g/Nm<sup>3</sup> toluene).

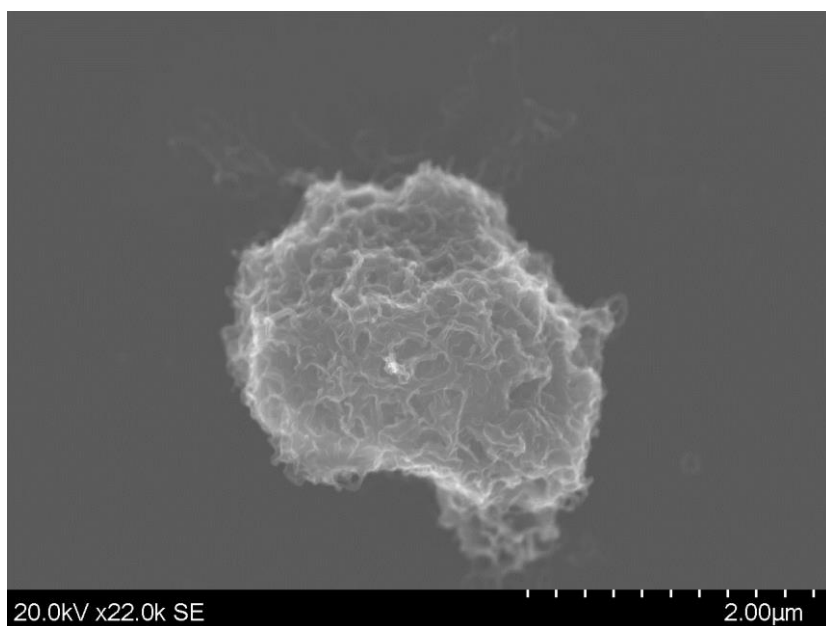

**Figure S14.** Unedited STEM image of partly fused/graphitized carbon filaments following tar steam reforming (temperature = 650 °C, S/C = 3.0, TOS = 8 hours, syngas = 10/35/25/25 mol% CH<sub>4</sub>/H<sub>2</sub>/CO/CO<sub>2</sub> with 5 mol% N<sub>2</sub> internal standard, Ar balance, syngas flow = 400 NmL/min, GHSV = 85000 NmL/g<sub>cat</sub>min, tar model = 10 g/Nm<sup>3</sup> toluene).

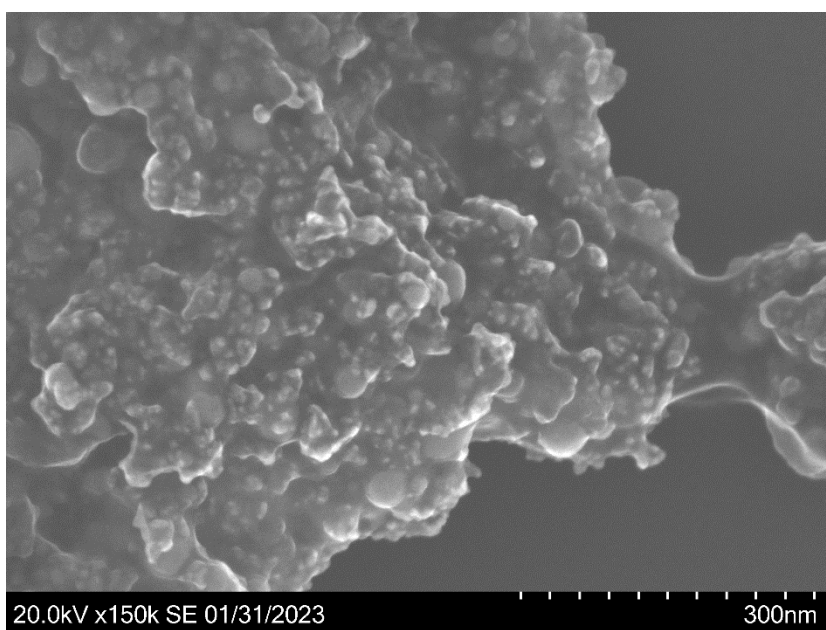

**Figure S15.** Unedited STEM image of bulk encapsulating coke following tar steam reforming (temperature = 700 °C, S/C = 2.0, TOS = 8 hours, syngas = 10/35/25/25 mol% CH<sub>4</sub>/H<sub>2</sub>/CO/CO<sub>2</sub> with 5 mol% N<sub>2</sub> internal standard, Ar balance, syngas flow = 400 NmL/min, GHSV = 85000 NmL/g<sub>cat</sub>min, tar model = 10 g/Nm<sup>3</sup> toluene).



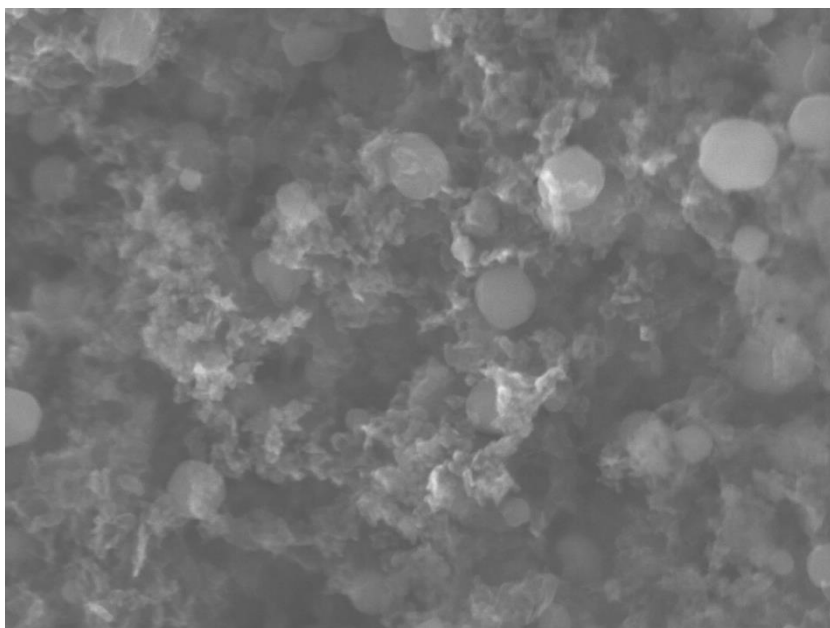

**Figure S16.** Unedited STEM image of sintered metal particles following tar steam reforming (temperature = 800 °C, S/C = 3.0, TOS = 8 hours, syngas = 10/35/25/25 mol% CH<sub>4</sub>/H<sub>2</sub>/CO/CO<sub>2</sub> with 5 mol% N<sub>2</sub> internal standard, Ar balance, syngas flow = 400 NmL/min, GHSV = 85000 NmL/g<sub>cat</sub>min, tar model = 10 g/Nm<sup>3</sup> toluene).
